# Supplementary material for: The Organellar Genome and Metabolic Potential of the Hydrogen-Producing Mitochondrion of Nyctotherus ovalis
Source: PubMed Central journal article supplement — Mol Biol Evol. 2011 Mar 4;28(8):2379–91. doi: 10.1093/molbev/msr059 (PMC3144386; doi:10.1093/molbev/msr059), 2011-03-04
Supplement: supp_msr059_Supplementary_Material.pdf [file supp_msr059_Supplementary_Material.pdf]

**Table S1: Proteins and RNAs likely involved in the organellar metabolism of *N. ovalis* and their presence or absence in 14 other species.**

Y indicates the presence of an ortholog of the mitochondrial protein in the corresponding species, N its absence. This information is not available for all species. O means that the information (position of the ortholog in the tree and presence of a predicted mitochondrial signal) is inconsistent. With the exception of Ram, Pla and Psp, whole genomes were available for analysis.

\* corresponds to proteins/RNAs of the *N. ovalis* genome that were already described in (Boxma et al. 2005).

Species with mitochondria: (Hsa) *Homo sapiens*, (Sce) *Saccharomyces cerevisiae*, (Tth) *Tetrahymena thermophila*, (Pte) *Paramecium tetraurelia*, (Ram) *Reclinomonas americana* and (Pfa) *Plasmodium falciparum*, species with hydrogenosomes: (Tva) *Trichomonas vaginalis*, (Blas) *Blastocystis*, (Pla) *Psalteriomonas lanterna*, (Psp) *Piromyces sp.* and species with a mitosomes: (Cpa) *Cryptosporidium parvum*, (Ehi) *Entamoeba histolytica*, (Gla) *Giardia lamblia* and (Ecu) *Encephalitozoon cuniculi*.

| <i>Mt proteins in N. ovalis</i>        | Accession number  | EC number | Mitochondria |     |     |     |     |             | Hydrogenosomes |       |     |     | Mitosomes |                  |                  |     |  |
|----------------------------------------|-------------------|-----------|--------------|-----|-----|-----|-----|-------------|----------------|-------|-----|-----|-----------|------------------|------------------|-----|--|
|                                        |                   |           | Hsa          | Sce | Tth | Pte | Ram | Pfa         | Tva            | Blas  | Pla | Psp | Cpa       | Ehi              | Gla              | Ecu |  |
| <b>mt catabolism/energy metabolism</b> |                   |           |              |     |     |     |     |             |                |       |     |     |           |                  |                  |     |  |
| PDH E1a*                               | AY623917          | 1.2.4.1   | Y            | Y   | Y   | Y   |     | Y, not mito | PFO            | Y+PFO | PFO | PFL | PNO       | PFO <sup>c</sup> | PFO <sup>c</sup> | Y   |  |
| PDH E1b *                              | AY628683          | 1.2.4.1   | Y            | Y   | Y   | Y   |     | Y, not mito | PFO            | Y+PFO | PFO | PFL | PNO       | PFO <sup>c</sup> | PFO <sup>c</sup> | Y   |  |
| PDH E2*                                | AY623925          | 2.3.1.12  | Y            | Y   | Y   | Y   |     | Y, not mito | PFO            | Y+PFO | PFO | PFL | PNO       | PFO <sup>c</sup> | PFO <sup>c</sup> | N   |  |
| PDH E3/GCS_L                           | AM897245          | 1.8.1.4   | Y            | Y   | Y   | Y   |     | O           | Y              | Y     |     |     | Y         | O                | O                | N   |  |
| Adenylate kinase 2*                    | AJ871316/AJ871317 | 2.7.4.3   | Y            | Y   | Y   | Y   |     | Y           | Y              | Y     |     |     | Y         | N                | N                | N   |  |
| D-lactate dehydrogenase*               | AJ871318          | 1.1.2.4   | Y            | Y   | Y   | Y   |     | N           | N              | Y     |     |     | N         | N                | N                | N   |  |
| Malic enzyme                           | AM899076          | 1.1.1.38  | N            | Y   | Y   | Y   |     | N           | Y              | N     |     | Y   | N         | Y                | Y                | N   |  |
| <b>TCA cycle</b>                       |                   |           |              |     |     |     |     |             |                |       |     |     |           |                  |                  |     |  |
| SDH a*                                 | AY616152          | 1.3.5.1   | Y            | Y   | Y   | Y   |     | Y           | N              | Y     |     |     | N         | N                | N                | N   |  |
| SDH b*                                 | AY619980          | 1.3.5.1   | Y            | Y   | Y   | Y   | Y   | Y           | N              | Y     |     |     | N         | N                | N                | N   |  |
| Succinyl-CoA synthetase β*             | AJ871319          | 6.2.1.4   | Y            | Y   | Y   | Y   |     | Y           | Y              | Y     |     |     | N         | N                | N                | N   |  |
| Succinyl-CoA synthetase α              | AM898998          | 6.2.1.5   | Y            | Y   | Y   | Y   |     | Y           | Y              | Y     |     |     | N         | N                | N                | N   |  |

| Mt proteins in <i>N. ovalis</i> | Accession number      | EC number | Mitochondria |     |     |     |     |     | Hydrogenosomes |      |     |     | Mitosomes |     |     |     |
|---------------------------------|-----------------------|-----------|--------------|-----|-----|-----|-----|-----|----------------|------|-----|-----|-----------|-----|-----|-----|
|                                 |                       |           | Hsa          | Scs | Tth | Pte | Ram | Pfa | Tva            | Blas | Pla | Psp | Cpa       | Ehi | Gla | Ecu |
| <b>mitochondrial complex I</b>  |                       |           |              |     |     |     |     |     |                |      |     |     |           |     |     |     |
| NAD1                            | GU057832              | 1.6.5.3   | Y            | N   | Y   | Y   | Y   | N   | N              | Y    |     |     | N         | N   | N   | N   |
| NAD2 *                          | AJ871267/<br>GU057832 | 1.6.5.3   | Y            | N   | Y   | Y   | Y   | N   | N              | Y    |     |     | N         | N   | N   | N   |
| NAD3                            | GU057832              | 1.6.5.3   | Y            | N   | Y   | Y   | Y   | N   | N              | Y    |     |     | N         | N   | N   | N   |
| NAD4                            | GU057832              | 1.6.5.3   | Y            | N   | Y   | Y   | Y   | N   | N              | Y    |     |     | N         | N   | N   | N   |
| NAD4L*                          | AJ871267/<br>GU057832 | 1.6.5.3   | Y            | N   | Y   | N   | Y   | N   | N              | Y    |     |     | N         | N   | N   | N   |
| NAD5*                           | AJ871267/<br>GU057832 | 1.6.5.3   | Y            | N   | Y   | Y   | Y   | N   | N              | Y    |     |     | N         | N   | N   | N   |
| NAD7*                           | AJ871267/<br>GU057832 | 1.6.5.3   | Y            | N   | Y   | Y   | Y   | N   | N              | Y    |     |     | N         | N   | N   | N   |
| NAD9                            | GU057832              | 1.6.5.3   | Y            | N   | Y   | Y   | Y   | N   | N              | Y    |     |     | N         | N   | N   | N   |
| NAD10                           | GU057832              | 1.6.5.3   | Y            | N   | Y   | Y   | Y   | N   | N              | Y    |     |     | N         | N   | N   | N   |
| 24kD*                           | AY628688              | 1.6.5.3   | Y            | N   | Y   | Y   | Y   | N   | Y              | Y    |     |     | N         | N   | N   | N   |
| 51kD*                           | AY608632              | 1.6.5.3   | Y            | N   | Y   | Y   | Y   | N   | Y              | Y    | Y   |     | N         | N   | N   | N   |
| NAD11/75kD*                     | AJ871573              | 1.6.5.3   | Y            | N   | Y   | Y   | Y   | N   | N              | Y    |     |     | N         | N   | N   | N   |

| Mt proteins in <i>N. ovalis</i>      | Accession number      | EC number | Mitochondria |     |     |     |     |     | Hydrogenosomes |      |     |     | Mitosomes |     |     |     |
|--------------------------------------|-----------------------|-----------|--------------|-----|-----|-----|-----|-----|----------------|------|-----|-----|-----------|-----|-----|-----|
|                                      |                       |           | Hsa          | Scs | Tth | Pte | Ram | Pfa | Tva            | Blas | Pla | Psp | Cpa       | Ehi | Gla | Ecu |
| <b>mt ribosomal proteins</b>         |                       |           |              |     |     |     |     |     |                |      |     |     |           |     |     |     |
| <i>RPS8</i>                          | GU057832              |           | N            | Y   | N   | N   | Y   | Y   | N              | Y    |     |     | N         | N   | N   | N   |
| <i>RPS12</i>                         | GU057832              |           | Y            | Y   | Y   | Y   | Y   | Y   | N              | Y    |     |     | N         | N   | N   | N   |
| <i>RPS14</i>                         | GU057832              |           | Y            | Y   | Y   | Y   | Y   | Y   | N              | Y    |     |     | N         | N   | N   | N   |
| <i>RPL2*</i>                         | AJ871267/<br>GU057832 |           | Y            | Y   | Y   | Y   | Y   | Y   | N              | Y    |     |     | O         | N   | N   | N   |
| <i>RPL6</i>                          | GU057832              |           | N            | Y   | Y   | Y   | Y   | N   | N              | Y    |     |     | N         | N   | N   | N   |
| RPL11 <sup>a</sup>                   | AM899415              |           | Y            | Y   | Y   | Y   | Y   | Y   | N              | Y    |     |     | N         | N   | N   | N   |
| RPL 14*                              | AJ871267/<br>GU057832 |           | Y            | Y   | Y   | N   | Y   | Y   | N              | Y    |     |     | N         | N   | N   | N   |
| RPL15 <sup>a</sup>                   | AM893303              |           | Y            | Y   | Y   | Y   |     | Y   | N              | Y    |     |     | N         | N   | N   | N   |
| RPL 20**                             | AJ871314/<br>GU057832 |           | Y            | N   | Y   | Y   | Y   | Y   | N              | Y    |     |     | N         | N   | N   | N   |
| <b>mt tRNA</b>                       |                       |           |              |     |     |     |     |     |                |      |     |     |           |     |     |     |
| tRNA tryptophane                     | GU057832              |           | Y            | Y   | Y   | Y   | Y   | N   | N              | Y    |     | N   | N         | N   | N   | N   |
| tRNA Phenylalanine                   | GU057832              |           | Y            | Y   | Y   | Y   | Y   | N   | N              | Y    |     | N   | N         | N   | N   | N   |
| tRNA tyrosine*                       | AJ871267/<br>GU057832 |           | Y            | Y   | Y   | Y   | Y   | N   | N              | Y    |     | N   | N         | N   | N   | N   |
| <b>mt rRNA</b>                       |                       |           |              |     |     |     |     |     |                |      |     |     |           |     |     |     |
| rns*                                 | AJ871267/<br>GU057832 |           | Y            | Y   | Y   | Y   | Y   | Y   | N              | Y    |     | N   | N         | N   | N   | N   |
| rnl                                  | GU057832              |           | Y            | Y   | Y   | Y   | Y   | Y   | N              | Y    |     | N   | N         | N   | N   | N   |
| <b>Propionate metabolism</b>         |                       |           |              |     |     |     |     |     |                |      |     |     |           |     |     |     |
| Methylmalonyl-CoA mutase             | AM897339              | 5.4.99.2  | Y            | N   | N   | N   |     | N   | N              | Y    |     | Y   | N         | N   | N   | N   |
| Propionyl-CoA carboxylase $\alpha^*$ | AJ871336              | 6.4.1.3   | Y            | N   | N   | N   |     | N   | N              | Y    | Y   |     | N         | N   | N   | N   |

| Mt proteins in <i>N. ovalis</i>                                  | Accession number | EC number | Mitochondria |     |     |     |     | Hydrogenosomes |     |      |     | Mitosomes |     |     |     |     |
|------------------------------------------------------------------|------------------|-----------|--------------|-----|-----|-----|-----|----------------|-----|------|-----|-----------|-----|-----|-----|-----|
|                                                                  |                  |           | Hsa          | Scs | Tth | Pte | Ram | Pfa            | Tva | Blas | Pla | Psp       | Cpa | Ehi | Gla | Ecu |
| <b>Fatty acid metabolism</b>                                     |                  |           |              |     |     |     |     |                |     |      |     |           |     |     |     |     |
| Long-chain-fatty-acid-CoA ligase 1*                              | AJ871337         | 6.2.1.3   | Y            | Y   | Y   | Y   |     | Y              | Y   | Y    |     |           | Y   | Y   | Y   | Y   |
| Glycerol kinase*                                                 | AJ871321         | 2.7.1.30  | Y            | Y   | Y   | Y   |     | Y              | Y   | Y    |     |           | N   | N   | Y   | N   |
| <b>amino acid metabolism</b>                                     |                  |           |              |     |     |     |     |                |     |      |     |           |     |     |     |     |
| PDH E3/GCS_L                                                     | AM897245         | 1.8.1.4   | Y            | Y   | Y   | Y   |     | O              | Y   | Y    |     |           | Y   | O   | O   | N   |
| GCS_H                                                            | AM897163         |           | Y            | Y   | Y   | Y   |     | Y              | Y   | Y    |     |           | N   | N   | N   | N   |
| GCS_T                                                            | AM893078         | 2.1.2.10  | Y            | Y   | Y   | Y   |     | Y              | N   | Y    |     |           | N   | N   | N   | N   |
| Serine hydroxymethyltransferase*                                 | AJ871334         | 2.1.2.1   | Y            | Y   | Y   | Y   |     | Y              | Y   | Y    |     |           | Y   | N   | N   | Y   |
| 2-oxoisovalerate dehydrogenase $\alpha$                          | AM895397         | 1.2.4.4   | Y            | N   | Y   | Y   |     | Y              | N   | N    |     |           | N   | N   | N   | N   |
| 2-oxoisovalerate dehydrogenase $\beta$                           | AM893656         | 1.2.4.4   | Y            | N   | Y   | Y   |     | Y              | N   | N    |     |           | N   | N   | N   | N   |
| Branched-chain $\alpha$ -keto acid dihydrolipoyl acyltransferase | AM897245         | 2.3.1.-   | Y            | Y   | Y   | Y   |     | Y              | N   | Y    |     |           | N   | N   | N   | N   |
| Branched-chain aa aminotransferase*                              | AJ871330         | 2.6.1.42  | Y            | Y   | Y   | Y   |     | N              | N   | Y    |     |           | N   | N   | N   | N   |
| alanine aminotransferase*                                        | AJ871331         | 2.6.1.2   | Y            | Y   | Y   | Y   |     | N              | Y   | Y    |     |           | N   | Y   | Y   | N   |
| Glutamate dehydrogenase*                                         | AJ871332         | 1.4.1.3   | Y            | Y   | Y   | Y   |     | Y              | Y   | N    | Y   |           | N   | N   | Y   | N   |
| Cystathionine $\beta$ -synthase*                                 | AJ871333         | 4.2.1.22  | O            | Y   | Y   | Y   |     | N              | N   | N    |     |           | N   | N   | N   | N   |
| Saccharopepsin <sup>b</sup> *                                    | AJ871335         | 3.4.23.25 | O            | Y   | N   | Y   |     | Y              | N   | N    |     |           | N   | N   | N   | N   |
| 5,10-methylenetetrahydrofolate synthetase                        | AM898130         | 6.3.3.2   | Y            | Y   | Y   | Y   |     | N              | N   | Y    |     |           | N   | N   | N   | N   |



| Mt proteins in <i>N. ovalis</i>               | Accession number | EC number | Mitochondria |     |     |     |     |     | Hydrogenosomes |      |     |     | Mitosomes |     |     |     |
|-----------------------------------------------|------------------|-----------|--------------|-----|-----|-----|-----|-----|----------------|------|-----|-----|-----------|-----|-----|-----|
|                                               |                  |           | Hsa          | Scs | Tth | Pte | Ram | Pfa | Tva            | Blas | Pla | Psp | Cpa       | Ehi | Gla | Ecu |
| <b>ROS defence system</b>                     |                  |           |              |     |     |     |     |     |                |      |     |     |           |     |     |     |
| Thioredoxin <sup>b*</sup>                     | AM895244         |           | Y            | Y   | Y   | N   |     | N   | Y              | Y    |     |     | O         | O   | N   | N   |
| Peroxiredoxin-4*                              | AM897142         | 1.11.1.15 | Y            | Y   | Y   | Y   |     | Y   | Y              | Y    |     |     | Y         | Y   | Y   | Y   |
| Glutathione reductase*                        | AM897249         | 1.8.1.7   | Y            | Y   | Y   | Y   |     | Y   | N              | Y    |     |     | Y         | N   | N   | N   |
| Hybrid cluster protein                        | AM890083         |           | N            | N   | N   | N   |     | N   | Y              | N    |     |     | N         | Y   | Y   | N   |
| <b>mt DNA repair/metabolism</b>               |                  |           |              |     |     |     |     |     |                |      |     |     |           |     |     |     |
| Uracil-DNA glycosylase                        | AM897482         | 3.2.2.-   | Y            | Y   | O   | O   |     | O   | O              | Y    |     |     | O         | O   | O   | O   |
| <b>Others</b>                                 |                  |           |              |     |     |     |     |     |                |      |     |     |           |     |     |     |
| elongation factor Tu                          | AM895994         |           | Y            | Y   | Y   | Y   |     | Y   | N              | Y    |     |     | N         | N   | N   | N   |
| Cytochrome c1                                 | AM899743         |           | Y            | Y   | Y   | Y   |     | Y   | N              | N    |     |     | N         | N   | N   | N   |
| Succinyl-CoA:3-ketoacid-CoA transferase*/ASCT | AJ871320         | 2.8.3.5   | Y            | N   | Y   | Y   |     | N   | N              | N    |     |     | N         | N   | N   | N   |
| Dynammin-related protein DNMI*                | AJ871343         | 3.6.1.50  | Y            | Y   | O   | O   |     | O   | O              | Y    |     |     | O         | O   | O   | O   |
| MPV17 protein*                                | AJ871353         |           | Y            | Y   | Y   | N   |     | N   | N              | Y    |     |     | N         | N   | N   | N   |
| Prohibitin*                                   | AJ871354         |           | Y            | Y   | O   | O   |     | Y   | N              | Y    |     |     | O         | N   | N   | N   |
| Protein C21orf2*                              | AJ871356         |           | Y            | N   | O   | O   |     | N   | O              | N    |     |     | N         | N   | O   | N   |
| ACN9 protein homolog                          | AM898820         |           | Y            | Y   | O   | O   |     | O   | N              | Y    |     |     | N         | N   | N   | N   |
| Methionyl-tRNA formyltransferase              | AM893972         | 2.1.2.9   | Y            | Y   | O   | O   |     | O   | N              | Y    |     |     | N         | N   | N   | N   |

- a) nuclear encoded organellar ribosomal proteins
- b) occurs in a relative
- c) Hsp90 was previously annotated hsp82
- d) we can not establish any orthology precisely for this mitochondrial carrier
- e) cytoplasmic localization

PFGE and Southern blotting on *N. ovalis* gDNA

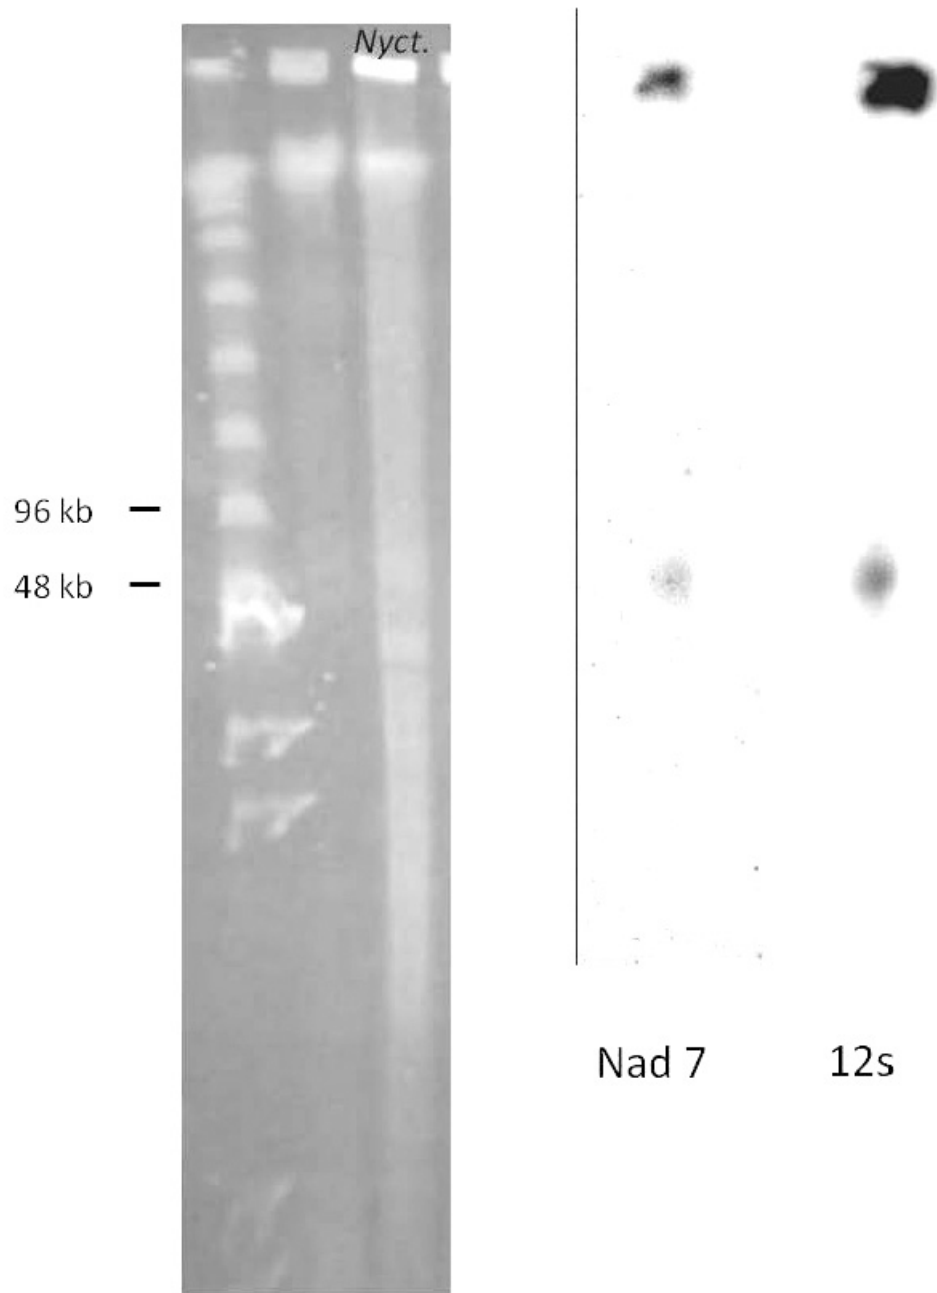

**Supplementary Figure 1**

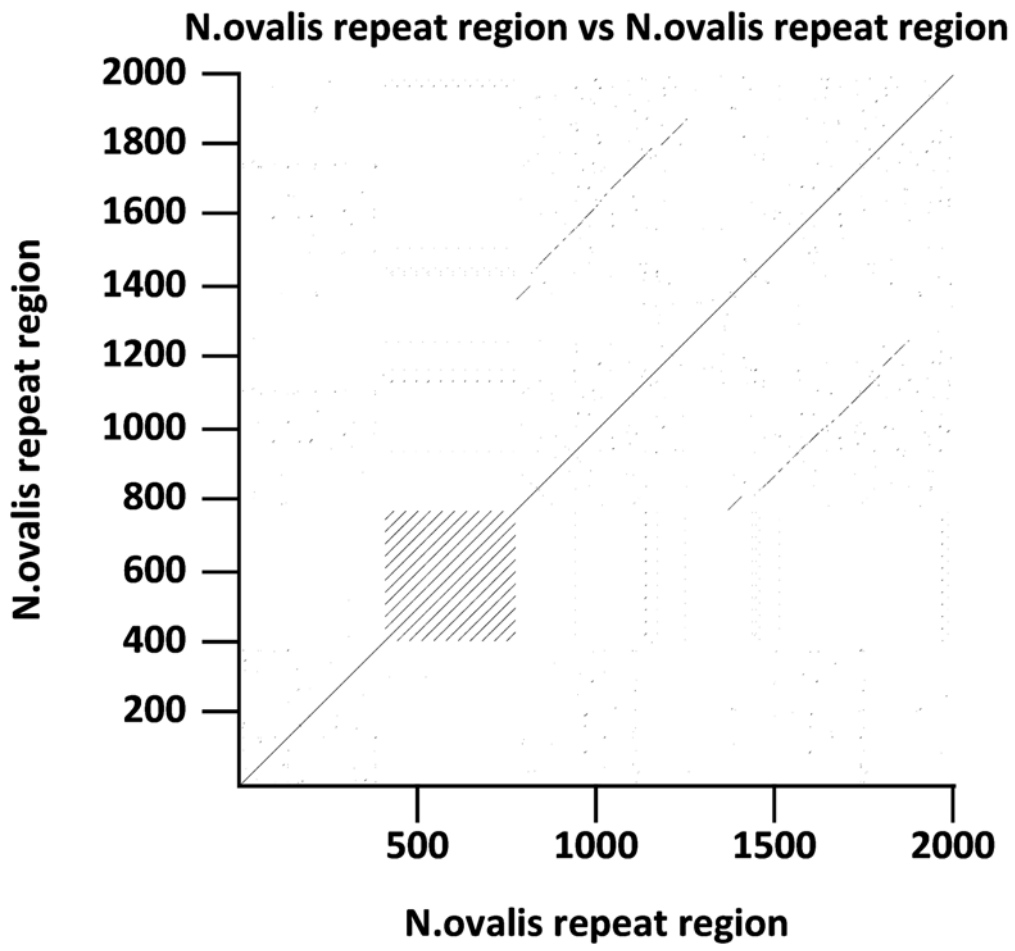

Supplementary Figure 2





Acetyl-Coenzyme A synthetase ML tree

0.2 substitutions/site

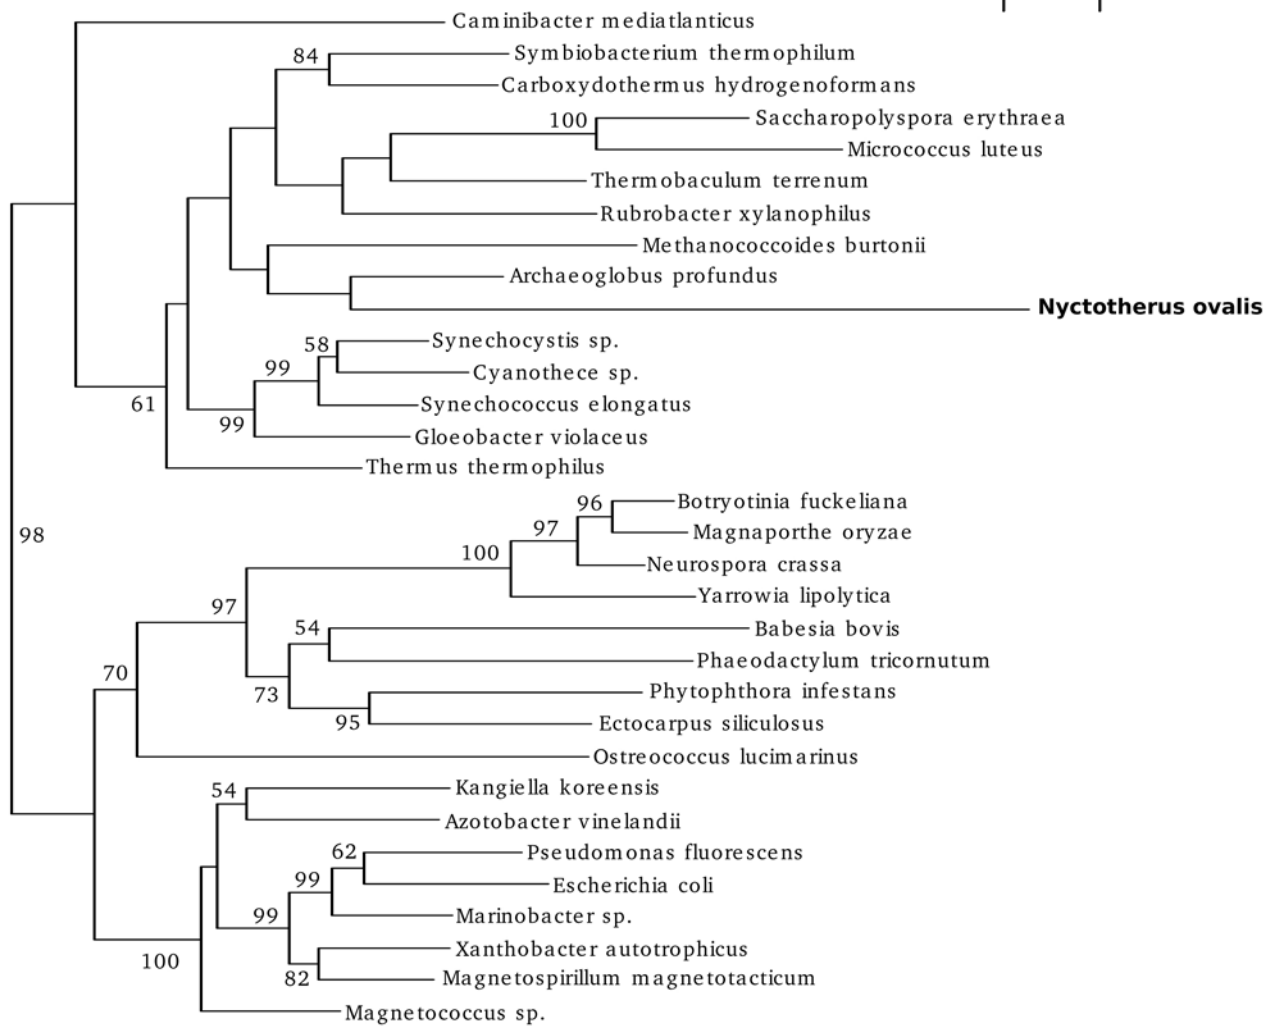

Supplementary Figure 4a

Beta lactamase

0.5 substitutions/site

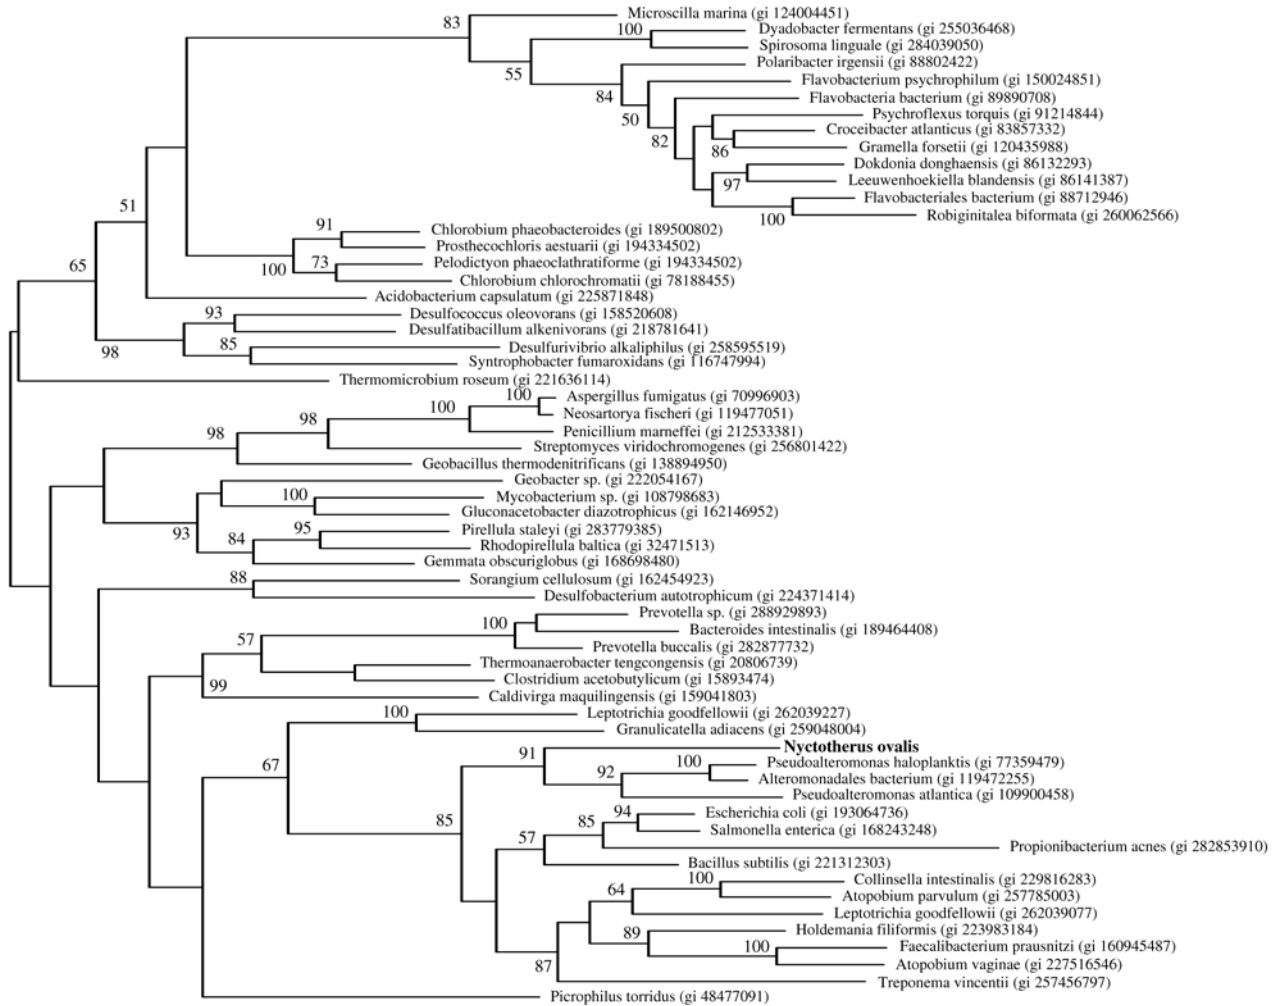

Supplementary Figure 4b

# Glycosylhydrolase

0.5 substitutions/site

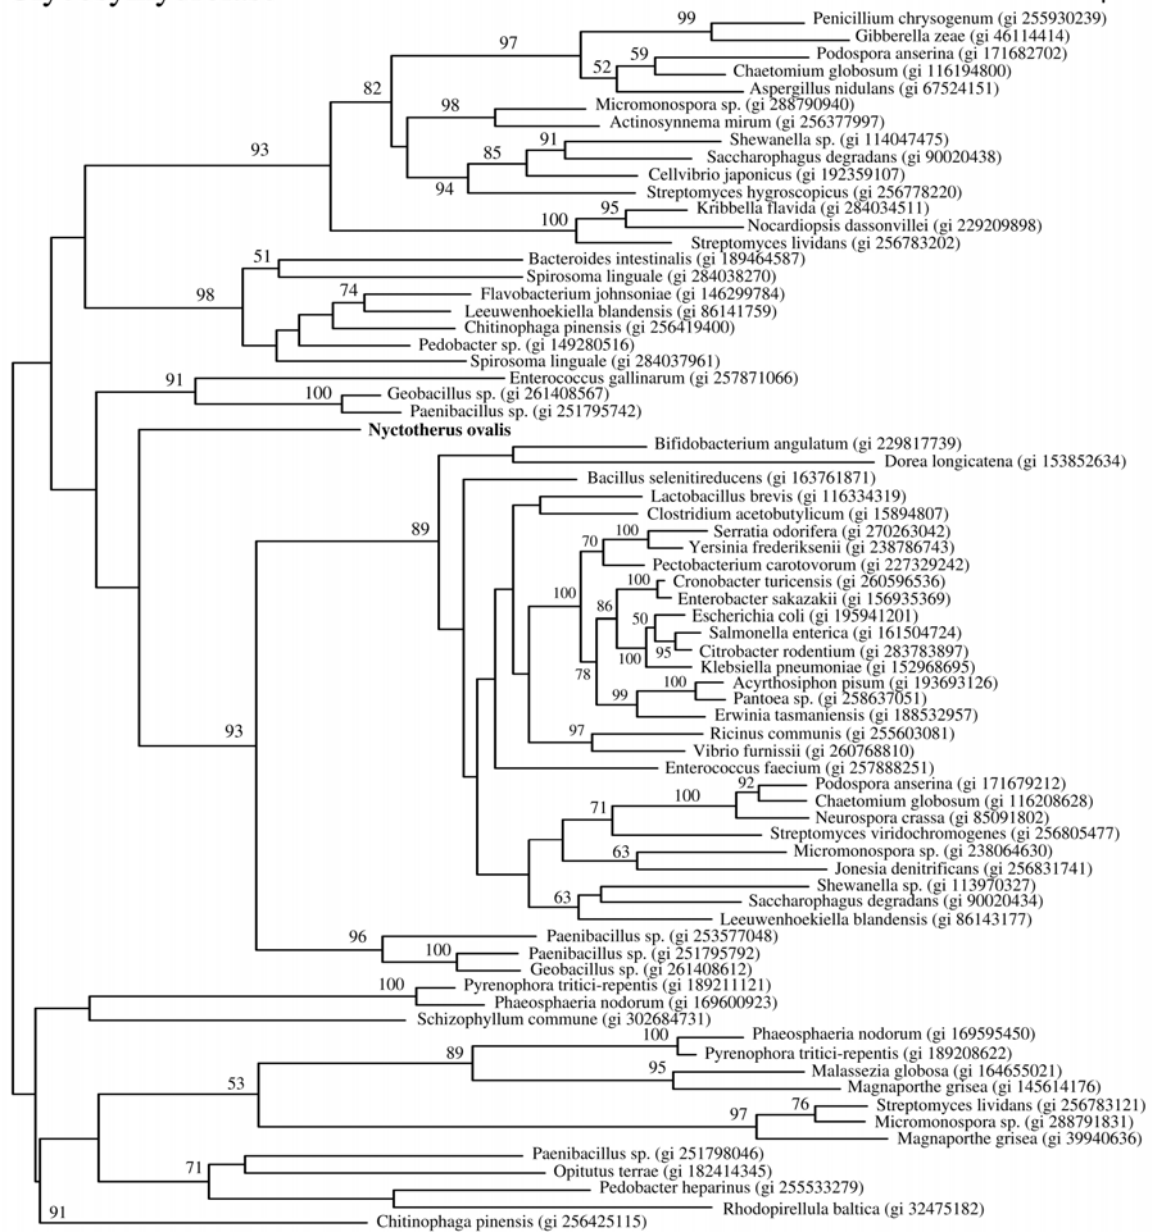

Supplementary Figure 4c

Ornithine carbamoyltransferase

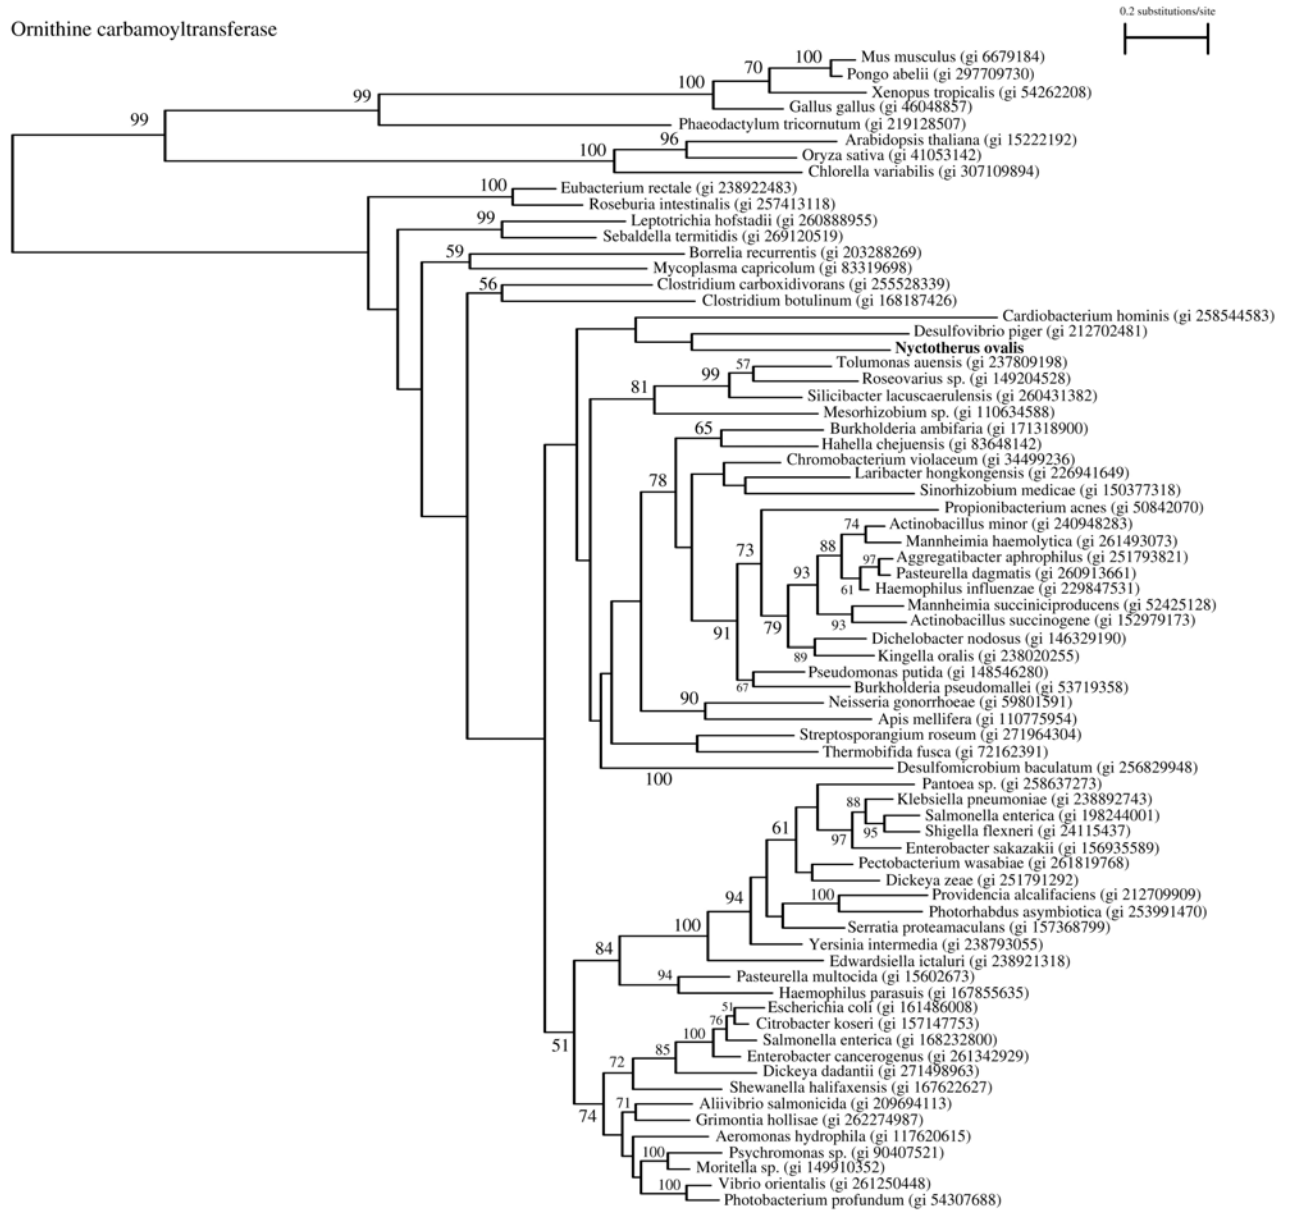

Supplementary Figure 4d
